# Supplementary material for: Massive Genomic Rearrangement Acquired in a Single Catastrophic Event during Cancer Development
Source: PubMed Central journal article supplement (PMC3065307; doi:10.1016/j.cell.2010.11.055), 2011-01-07
Supplement: mmc6.pdf [file mmc6.pdf]

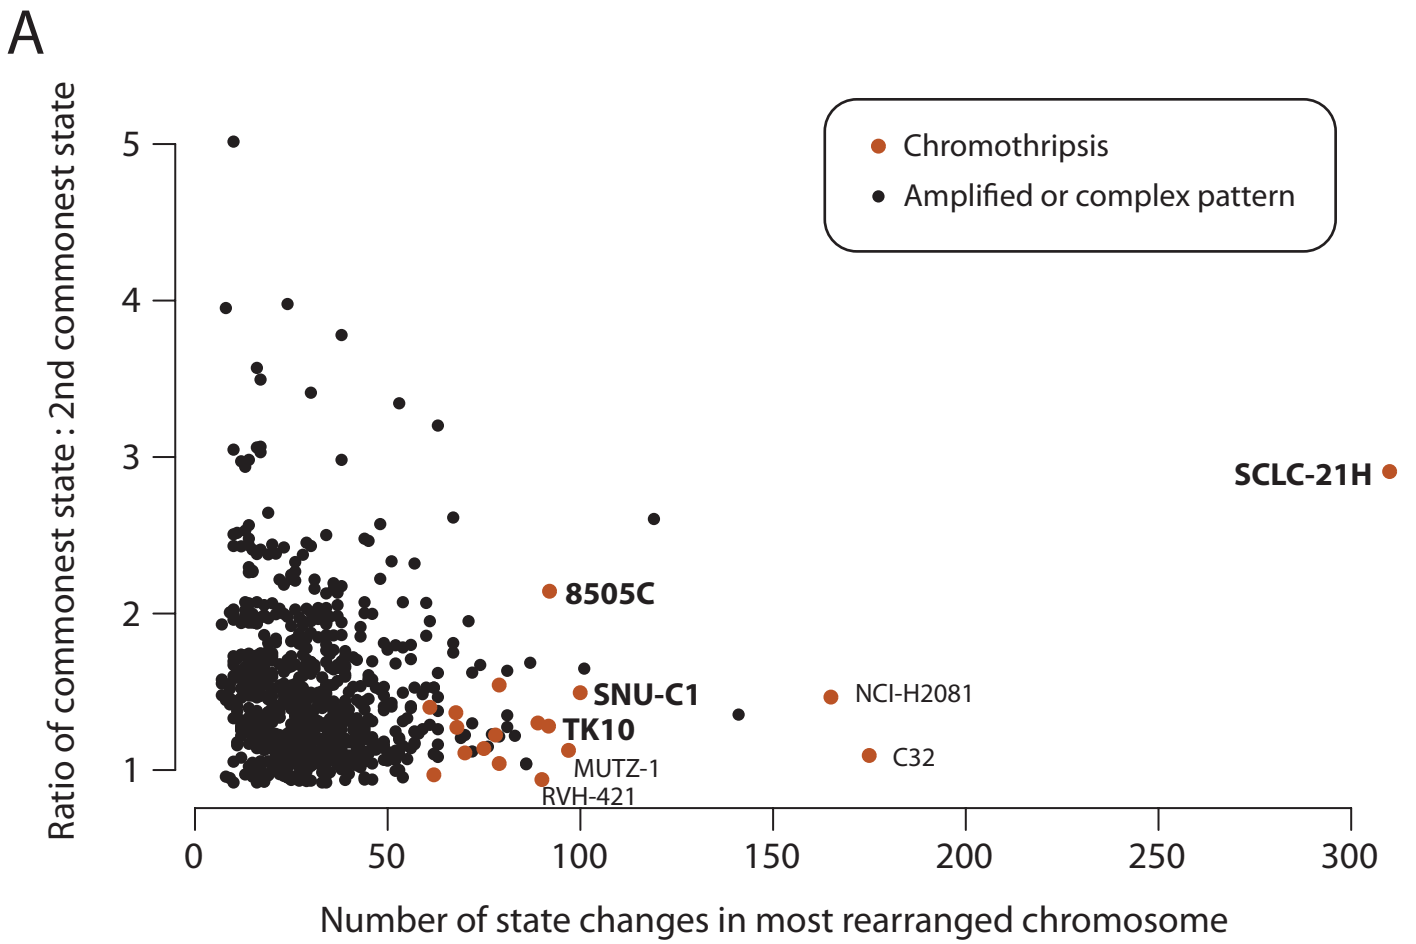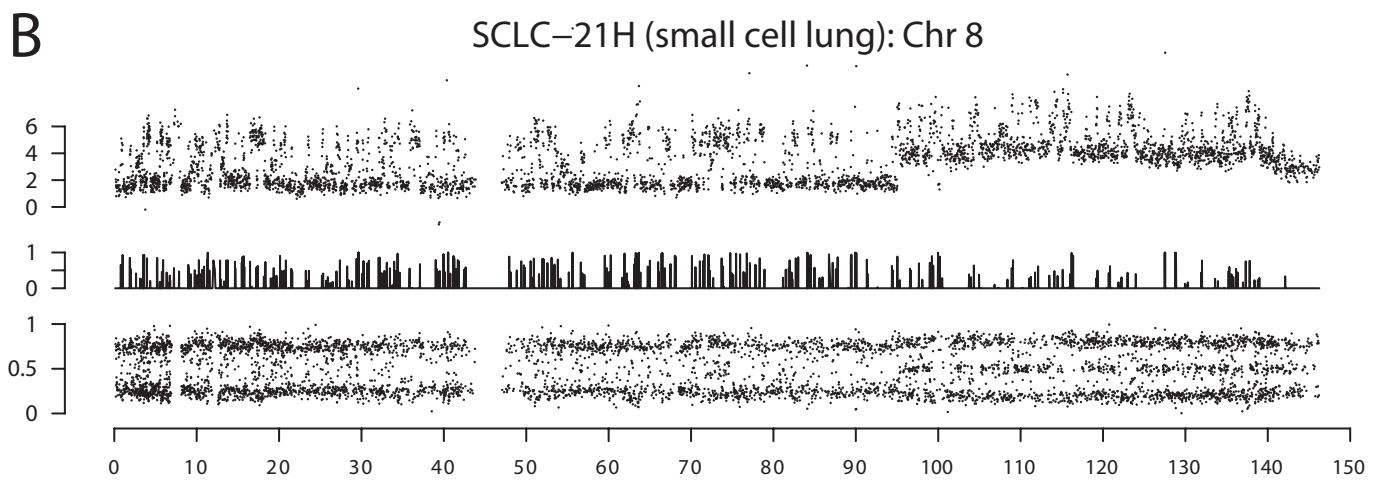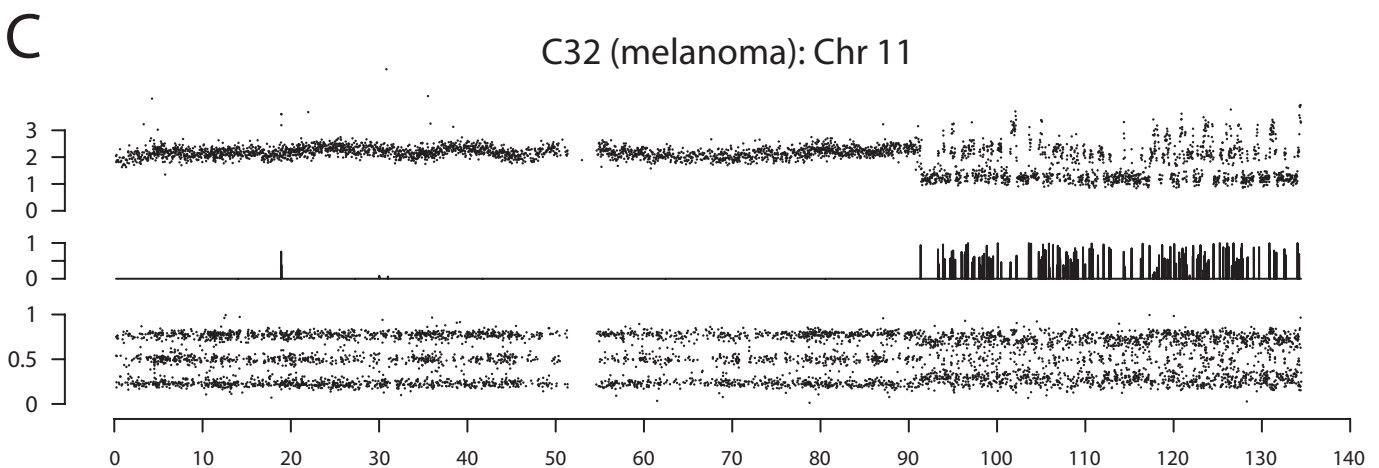

**D**

A172 (glioblastoma): Chr 16

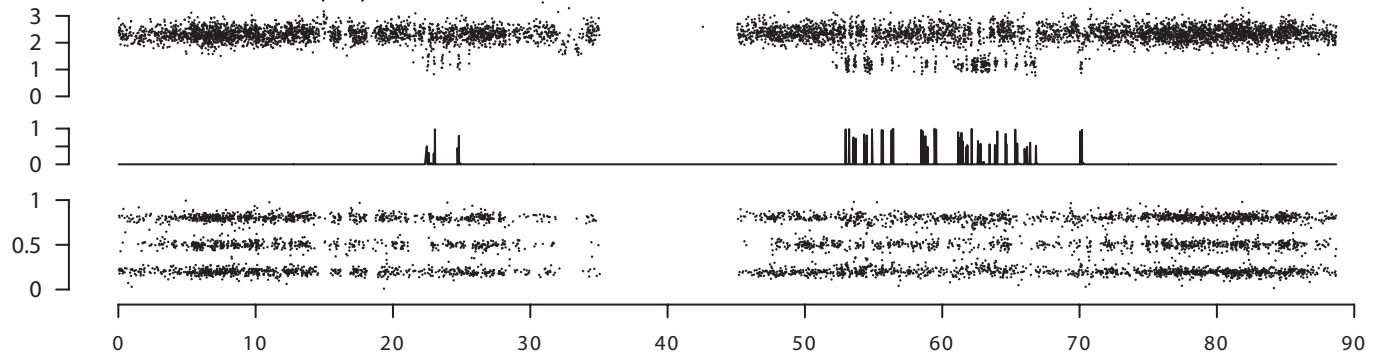**E**

NCI-H226 (squamous cell lung): Chr 3

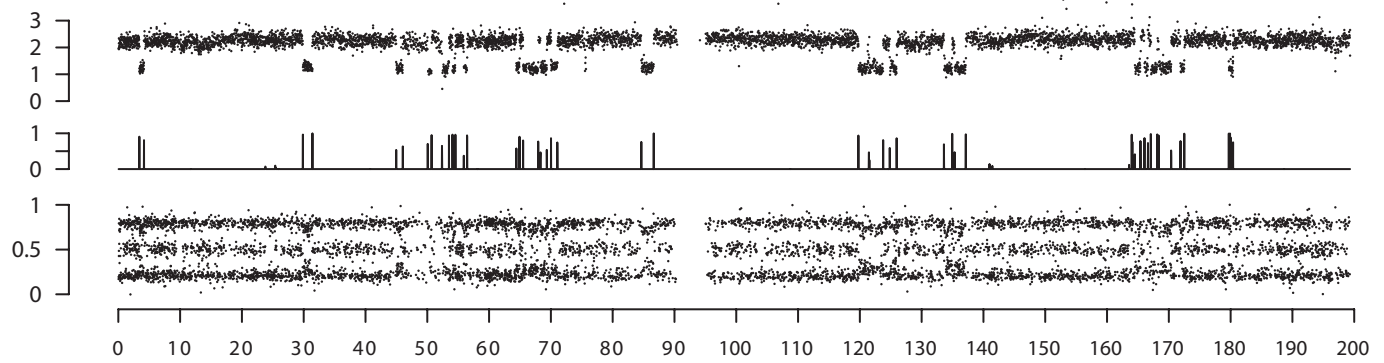**F**

NCI-H2081 (small cell lung): Chr 3

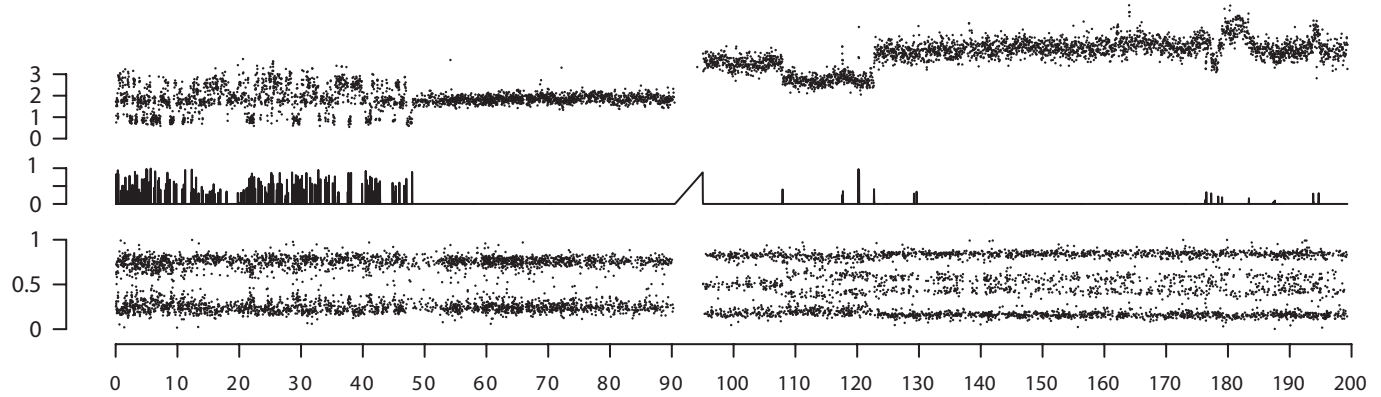**G**

SNU-C1 (colorectal): Chr 15

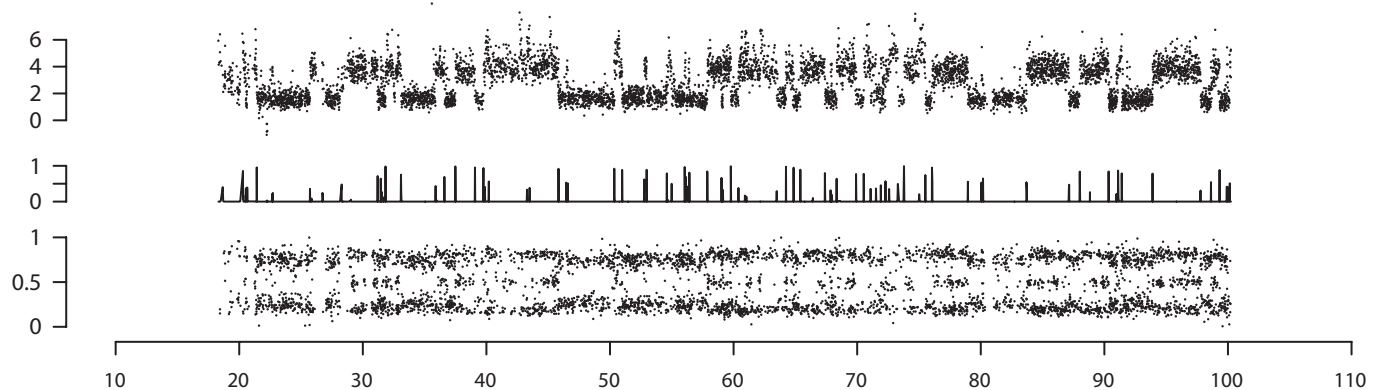

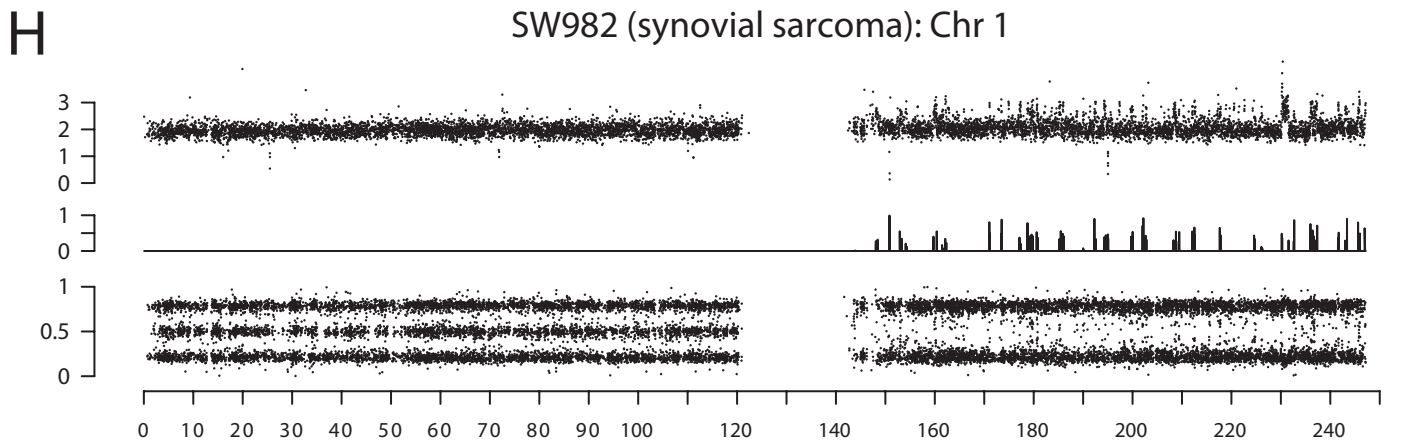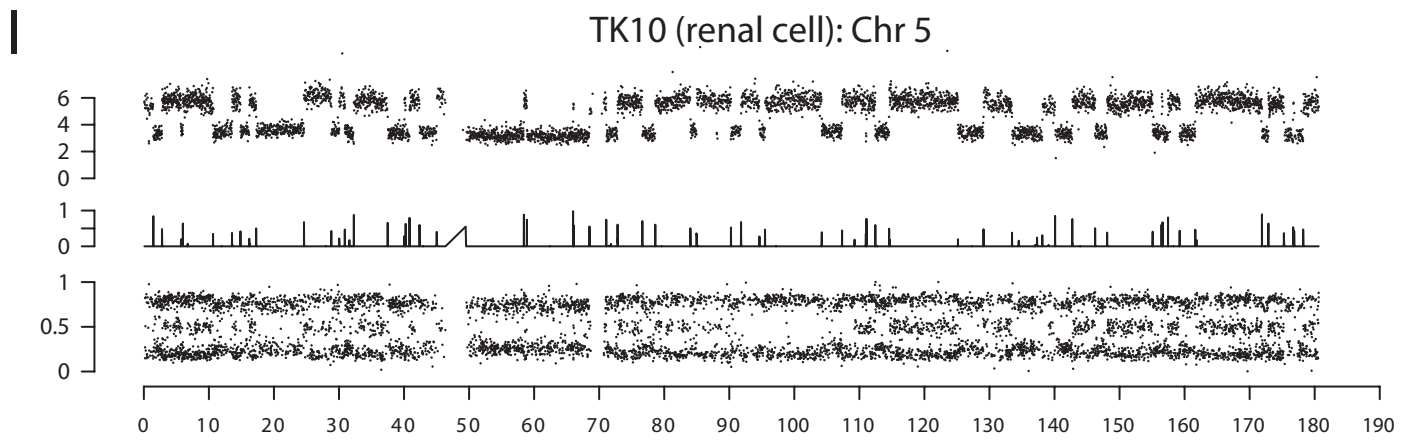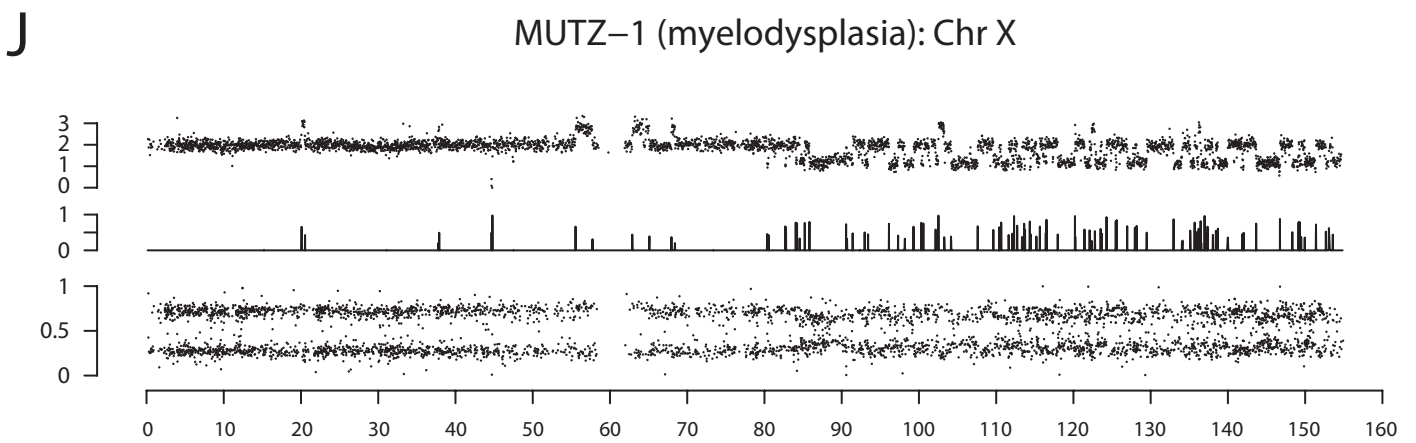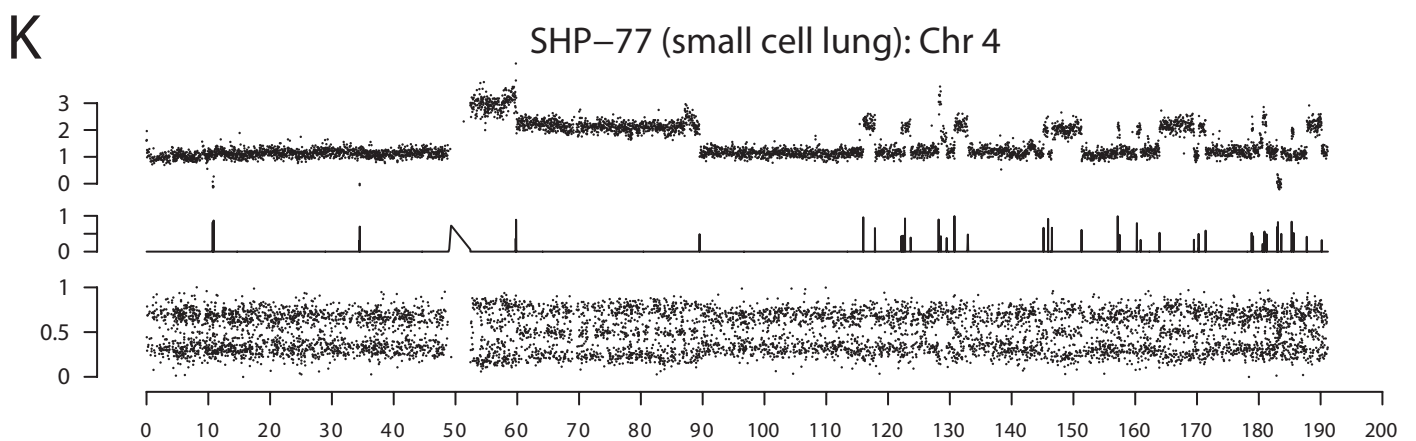

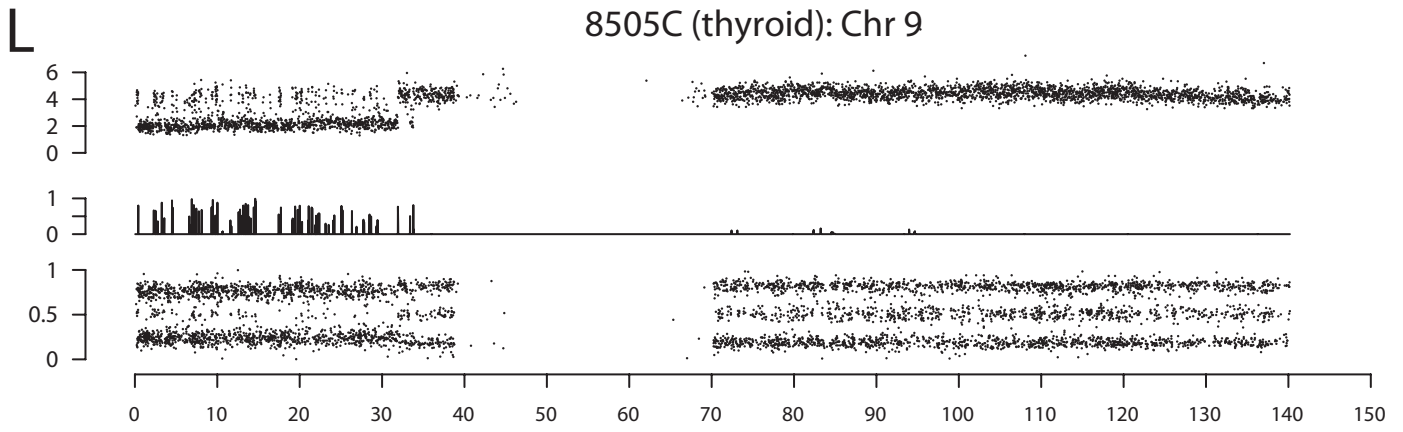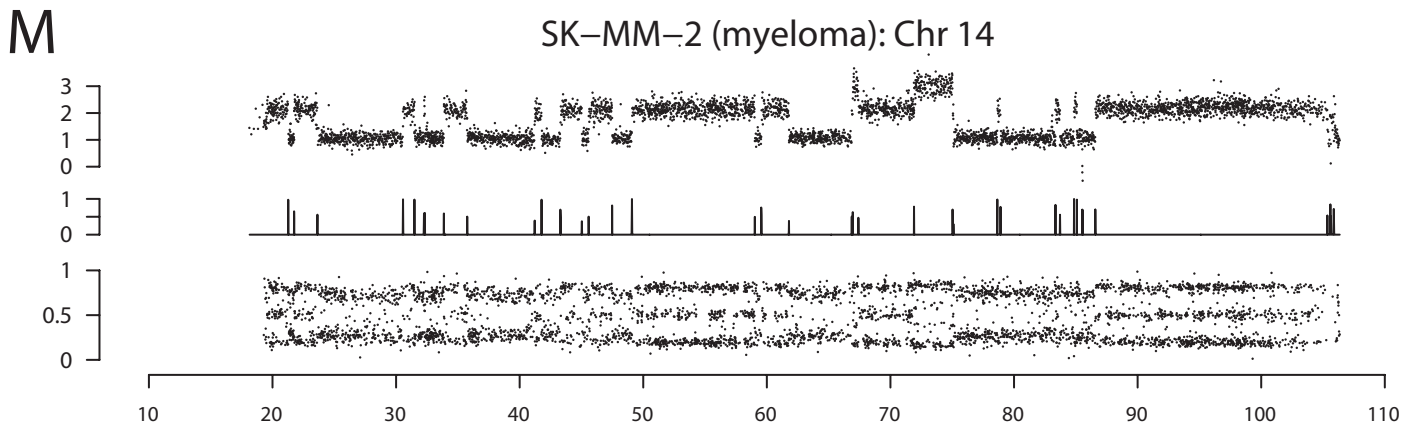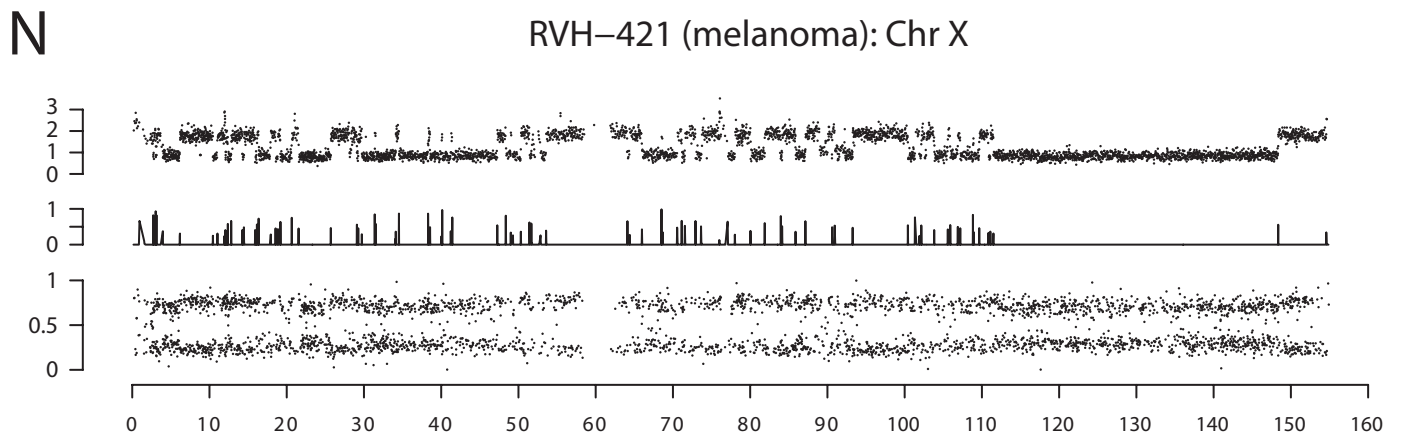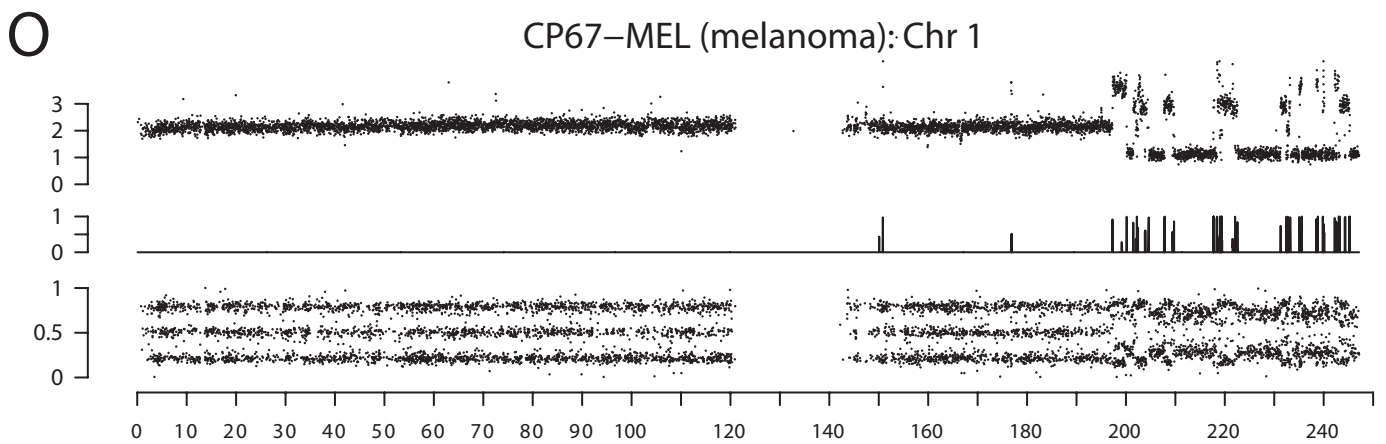

**P** KYSE-450 (oesophageal): Chr 4

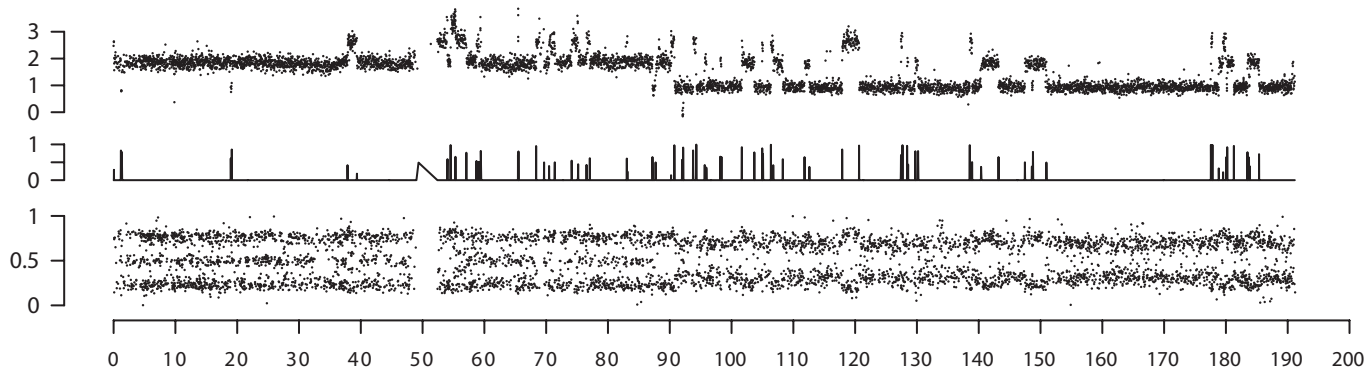

**Q** HMV-II (melanoma): Chr 3

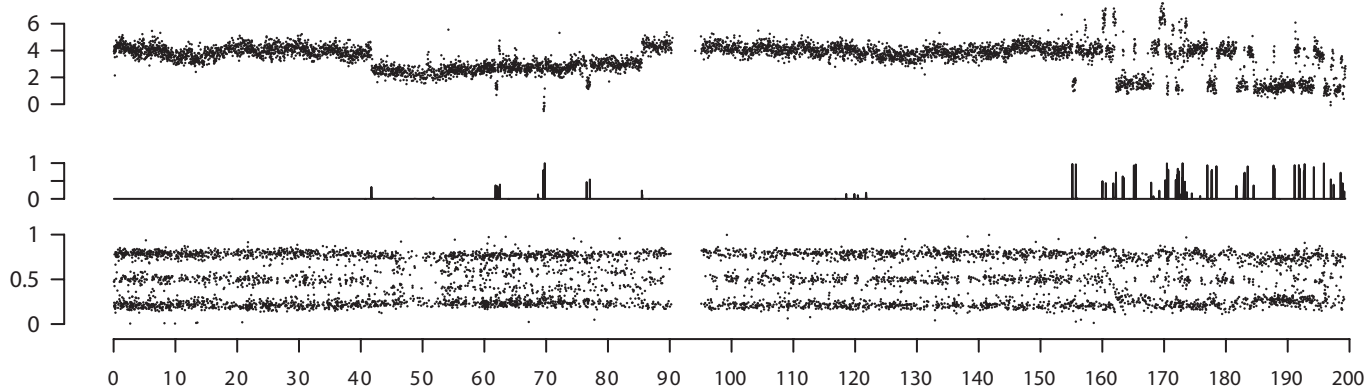

**R** D-397MG (astrocytoma): Chr 7

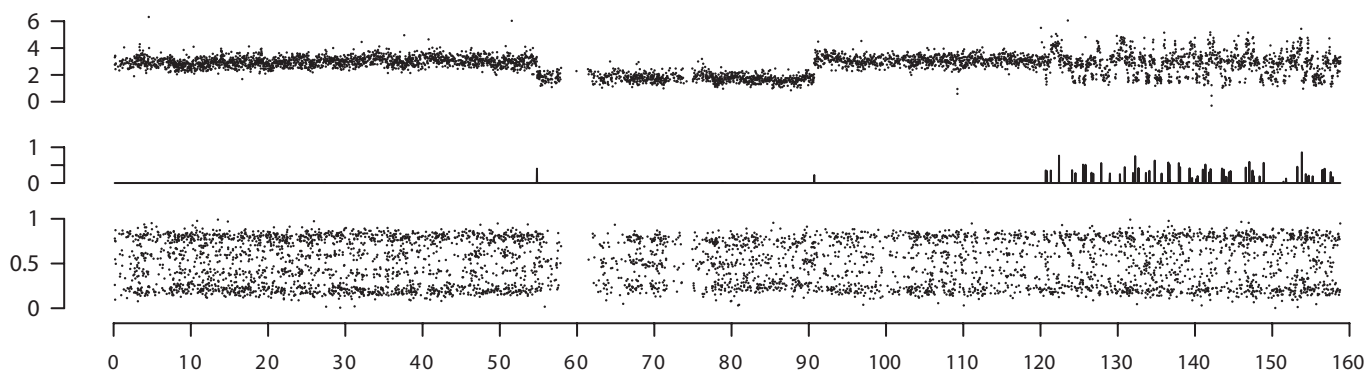

**S** D-538MG (astrocytoma): Chr 3

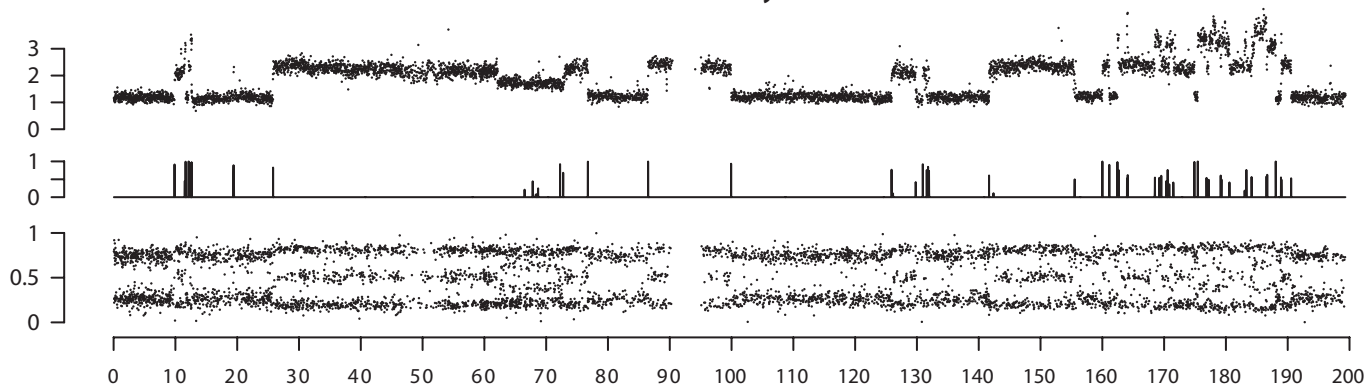

T

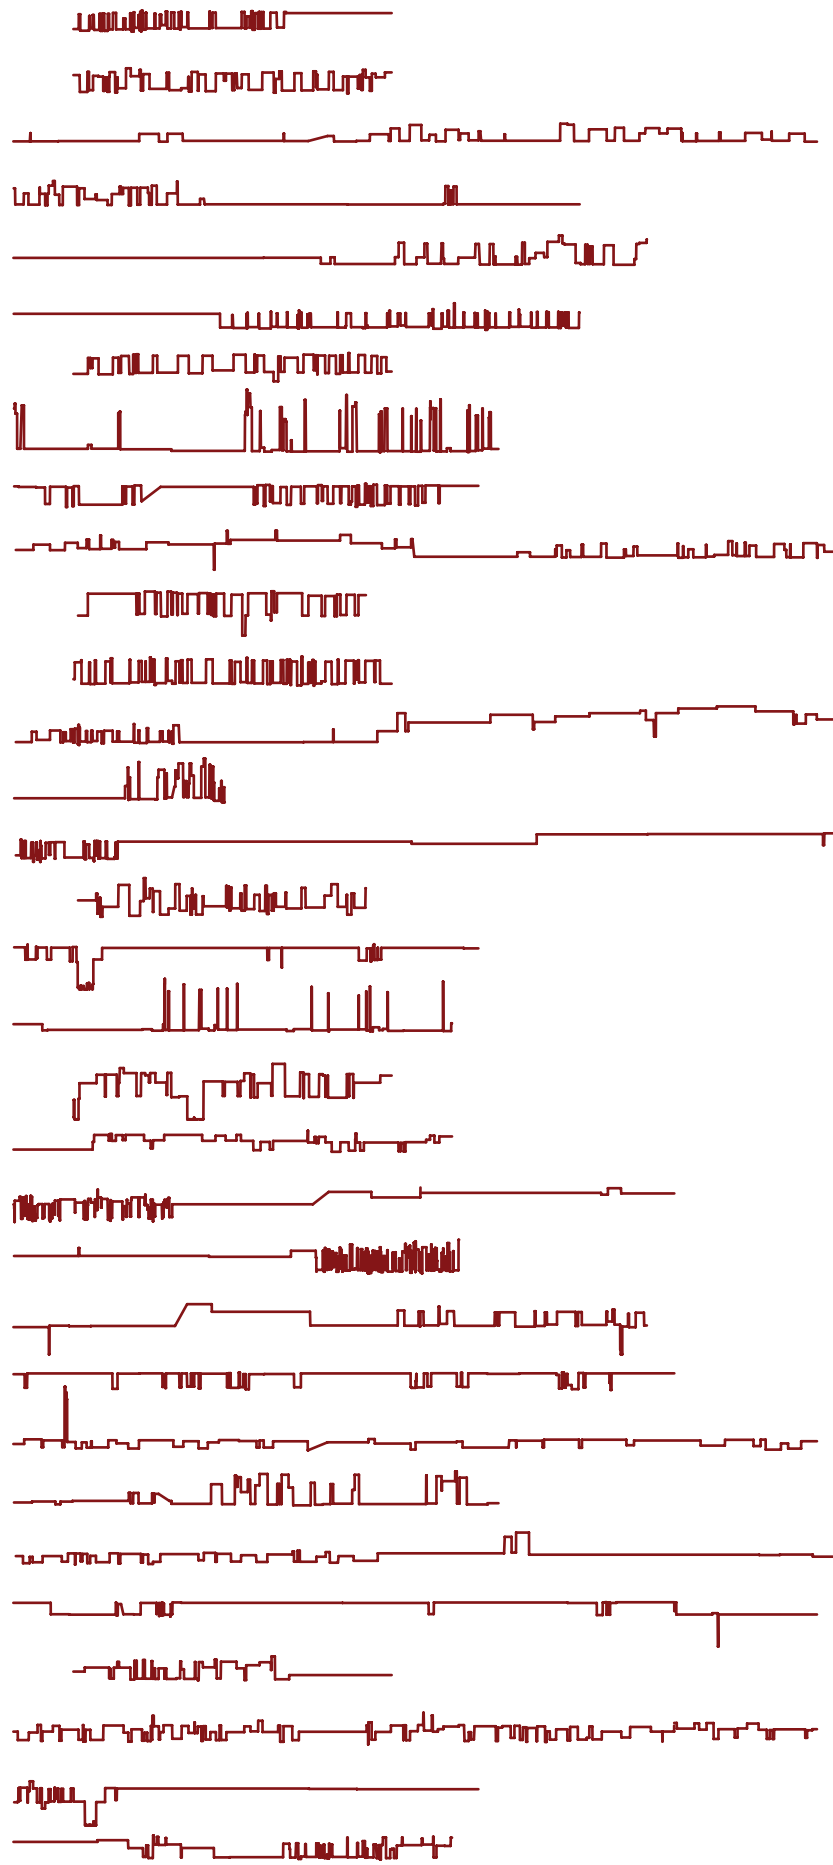

- WINZE\_p\_Sty19\_CORRECTED\_Mapping250K\_Sty\_G06\_82096: Chr 13
- VINOS\_p\_Sty8\_Mapping250K\_Sty\_C07\_54134: Chr 13
- UNZIP\_p\_Sty14\_Mapping250K\_Sty\_F06\_67964: Chr 2
- UNLET\_p\_Sty18\_Mapping250K\_Sty\_F12\_79496: Chr 6
- STAND\_p\_Affy\_plate\_8\_Mapping250K\_Sty\_B06\_49342: Chr 4
- SPICA\_p\_Sty32\_CO-166838\_Mapping250K\_Sty\_G01\_121516: Chr 6
- SOARS\_p\_Sty23\_Mapping250K\_Sty\_H09\_89068: Chr 13
- SOARS\_p\_Sty23\_Mapping250K\_Sty\_F03\_88968: Chr 8
- SHOER\_p\_Sty12\_Mapping250K\_Sty\_H12\_67680: Chr 9
- SHOER\_p\_Sty12\_Mapping250K\_Sty\_H11\_67664: Chr 1
- SHOER\_p\_Sty12\_Mapping250K\_Sty\_D03\_67528: Chr 14
- LORDS\_p\_Japan\_SNP\_CO-59748\_Mapping250K\_Sty\_G11\_88714: Chr 13
- LINED\_p\_STY36\_Mapping250K\_Sty\_G04\_147742: Chr 1
- HEWED\_p\_250KSty\_Plate\_20060123\_GOOD\_C09\_46376: Chr 19
- GUSTO\_p\_Sty20\_Mapping250K\_Sty\_F11\_81790: Chr 1
- GSM182925: Chr 14
- GSM128125: Chr 9
- EA06028\_0401-10F\_STY250\_SS493139@PCRS: Chr 12
- EA06028\_0401-02F\_STY250\_SS493131@PCRS: Chr 13
- EA06028\_0401-02D\_STY250\_SS493107@PCRS: Chr 12
- EA06028\_0401-01B\_STY250\_SS493082@PCRS: Chr 3
- EA06028\_0199-07A\_Sty250\_SS356911@PCRS: Chr 11
- EA06028\_0119-07D\_Sty250\_SS285182@PCRS: Chr 4
- EA06028\_0119-07A\_Sty250\_SS285150@PCRS: Chr 3
- EA06028\_0119-03E\_Sty250\_SS285188@PCRS: Chr 2
- DRAWS\_p\_Sty11\_Mapping250K\_Sty\_H09\_66666: Chr 8
- DRAWS\_p\_Sty11\_Mapping250K\_Sty\_E01\_66532: Chr 1
- DRAWS\_p\_Sty11\_Mapping250K\_Sty\_D10\_66674: Chr 2
- DEBUG\_p\_Japan\_SNP\_CO-58875\_Mapping250K\_Sty\_G08\_88282: Chr 13
- DEBUG\_P\_Japan\_SNP\_CO-58875\_Mapping250K\_Sty\_F07\_88264: Chr 2
- COMET\_p\_Sty15\_Mapping250K\_Sty\_F06\_70084: Chr 9
- AIRNS\_p\_Sty5\_Mapping250K\_Sty\_F12\_50214: Chr 12

0 50 100 150 200 250  
Genomic position (Mb)
